# Supplementary material
Source: PubMed Central journal article supplement (PMC7584892)

## Supplementary Information

### Supplementary Figure Legends

**Figure S1. (A)** Histograms represent median fluorescence intensity of surface immunoglobulin expression in LCLs determined by flow cytometry. **(B)** Correlation matrix (Pearson's correlation coefficient) between biological replicates for the LCL GPome, based on SILAC fold change values for all quantified p-sites. H: heavy (BCR-stimulated LMP2A-KO), M: medium (EBV-WT), L: light (LMP2A-KO). **(C-D)** Western blot analysis of total tyrosine phosphorylation (C) and selective BCR downstream effectors (D) in 5-minute BCR-stimulated and unstimulated LCLs. **(E)** Pathway enrichment analysis (Reactome terms) for proteins differentially phosphorylated (Up: significantly increased, Down: significantly decreased; Benjamini-Hochberg adjusted p-value < 0.001 and absolute  $\log_2$  fold change  $\geq 1$ ) in the GPome of EBV-WT (blue) or BCR-stimulated LMP2A-KO (orange) LCLs relative to LMP2A-KO cells.

**Figure S2. (A)** Scatter plot of  $\log_2$  SILAC ratios for the GPome from BCR-stimulated or LMP2A-positive MYC-expressing mouse B cells, normalized to unstimulated MYC-expressing mouse B cells. The Spearman's rank correlation coefficient ( $r$ ) is shown. Orange and blue dots indicate significantly concordantly and discordantly regulated p-sites, respectively, and selected hits are labeled. **(B)** Same as (A), for the pYome. **(C)** Pathway enrichment analysis (Reactome terms) for proteins differentially phosphorylated (Up: significantly increased, Down: significantly decreased) in the GPome of LMP2A-positive MYC-expressing mouse B cells, normalized to unstimulated MYC-expressing mouse B cells. Pathways that were also significantly enriched in LCLs are indicated in boldface.

**Figure S3. (A)** The network topology of genes encoding proteins related to BCR signaling is shown. For each protein, significant changes in phosphorylation in the LCL pYome are color-coded as indicated (left icon: EBV-WT; right icon: BCR-stimulation LMP2A-KO). Proteins that do not exhibit concordantly increased or decreased phosphorylation across all p-sites are referred to as 'mixed'.

**Figure S4. (A)** Principal component analysis of EBV-WT, LMP2A-KO and BCR-stimulated LMP2A-KO LCL gene expression. Genes with zero counts across all samples were excluded from the analysis. **(B)** Hierarchical clustering of the top 50 differentially expressed genes (adjusted p-value  $\leq 10^{-5}$ , likelihood ratio test). **(C)** Pathway enrichment analysis (Reactome terms) for genes

that were differentially expressed in the indicated conditions.

**Figure S5. (A)** Validation of indicated pro- and anti-apoptotic protein expression in LCLs by Western blot analysis.

### **Dataset Legends**

**Dataset S1.** Quantified p-sites from the global phosphoproteome (GPome) in human LCLs, and significantly differentially phosphorylated p-sites.

**Dataset S2.** Quantified p-sites from the tyrosine phosphoproteome (pYome) in human LCLs, and significantly differentially phosphorylated p-sites.

**Dataset S3.** Quantified p-sites from the global phosphoproteome (GPome) in Myc-expressing transgenic mouse cells, and significantly differentially phosphorylated p-sites.

**Dataset S4.** Quantified p-sites from the tyrosine phosphoproteome (pYome) in Myc-expressing transgenic mouse cells, and significantly differentially phosphorylated p-sites.

**Dataset S5.** Differentially expressed genes from RNA-seq profiling of human LCLs.

**Dataset S6.** Enriched gene signatures from gene signature enrichment analysis based on quantified gene expression.

**Dataset S7.** Quantified proteins from total proteome analysis of human LCLs, and differentially expressed proteins.



A

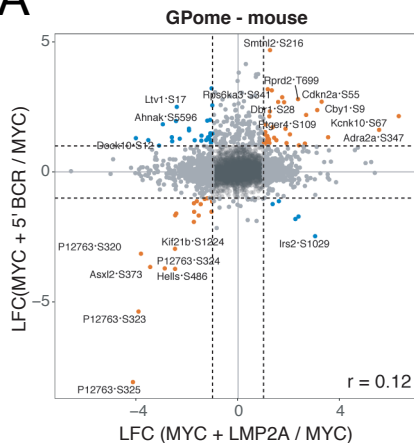

B

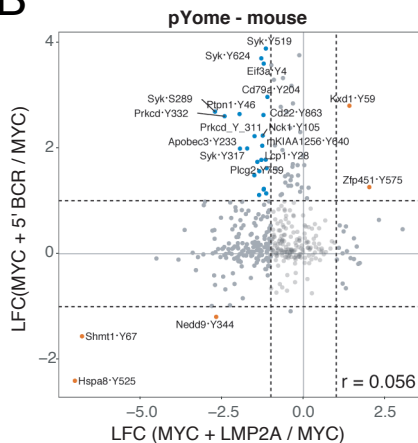

C

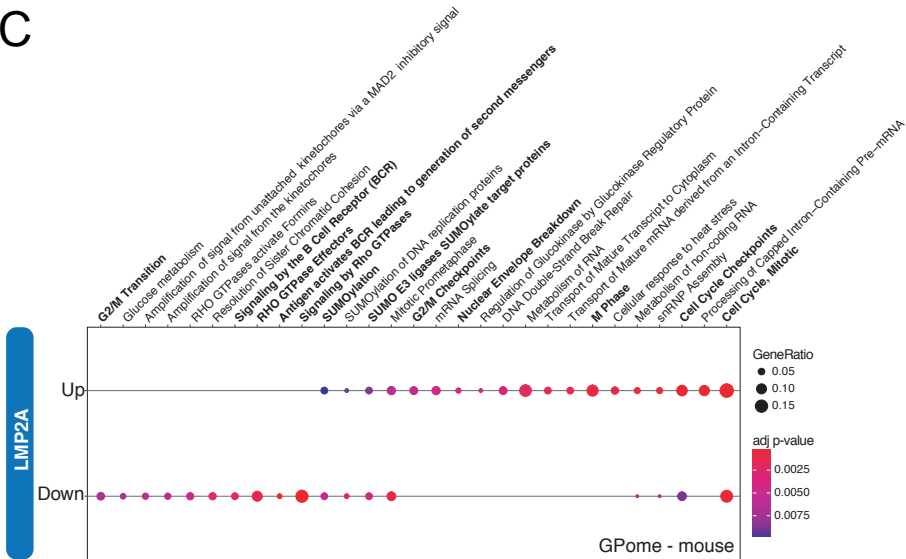

A

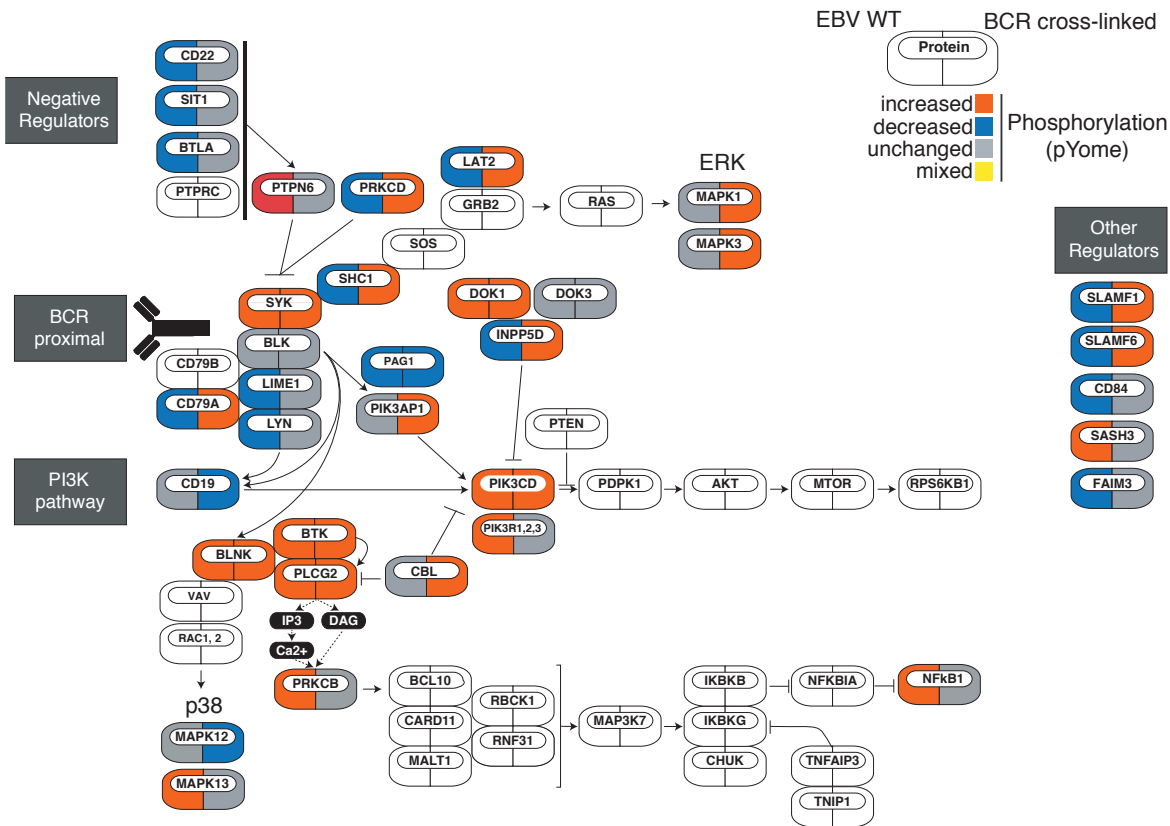

A

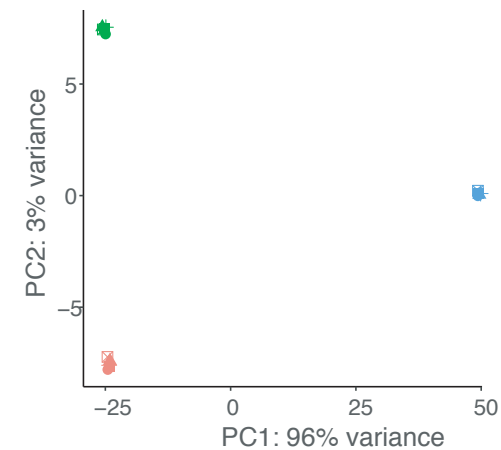

B

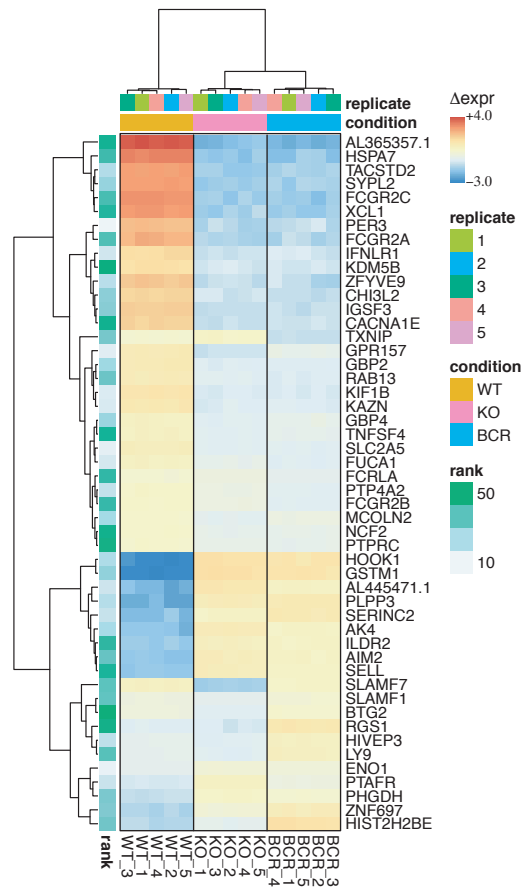

C

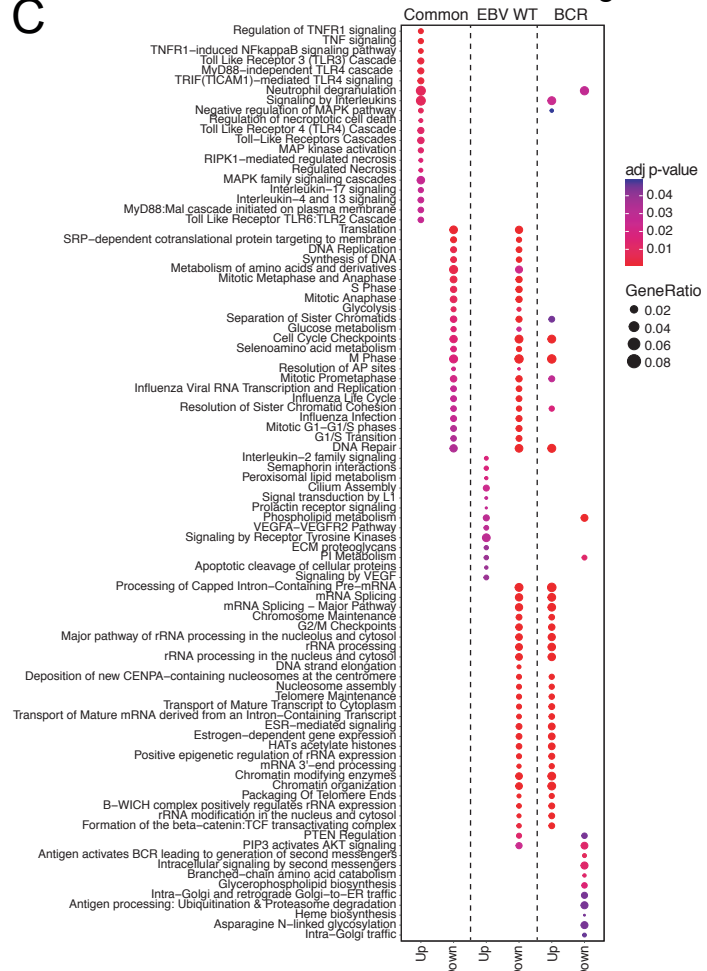

Figure S5

A

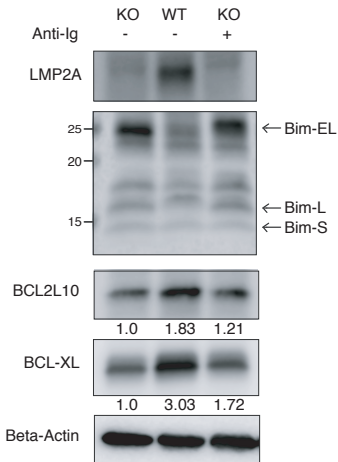

Supplement: pnas.2007946117.sapp.pdf [file pnas.2007946117.sapp.pdf]
